# Supplementary material for: Effect of the Hf content on the microstructure and ferroelectric properties of HfxZr1−xO2 thin films using an all-inorganic aqueous precursor solution
Source: Royal Society of Chemistry journal article supplement (doi:10.1039/d1nr02667d), 2021-01-01
Supplement: d1nr02667d1.pdf [file d1nr02667d1.pdf]

## Supporting Information

### Effect of Hf content on the microstructure and ferroelectric properties in $\text{Hf}_x\text{Zr}_{1-x}\text{O}_2$ thin films by all-inorganic aqueous precursor solution

Jingjing Wang<sup>a</sup>, Dayu Zhou<sup>a,\*</sup>, Wei Dong<sup>a</sup>, Ziqi Li<sup>a</sup>, Nana Sun<sup>a</sup>, Xiaoduo Hou<sup>a</sup>,

Feng Liu<sup>b</sup>

<sup>a</sup> Key Laboratory of Materials Modification by Laser, Ion, and Electron Beams

(Ministry of Education), School of Materials Science and Engineering, Dalian

University of Technology, Dalian 116024, China

\*To whom corresponding should be addressed:

\* Email: [zhodayu@dlut.edu.cn](mailto:zhodayu@dlut.edu.cn)

<sup>b</sup> Instrumental Analysis & Research Center, Dalian University of Technology •

Panjin Campus, Panjin 124221, China

## **S1. The hard mask for the top electrode and measurement structure of $\text{Hf}_x\text{Zr}_{1-x}\text{O}_2$ (HZO) film**

The hard mask design drawing of TiN top electrode was shown in Fig. S1(a). With the aid of a stainless steel mask, 80 nm thick TiN of circular electrode points with the radius of 55  $\mu\text{m}$ , 100  $\mu\text{m}$  and 225  $\mu\text{m}$ , and two big rectangular electrode structures (5500 $\times$ 4000  $\mu\text{m}^2$ ) prepared by magnetron sputtering process were fabricated on the surface of the crystalline HZO film. In this work, n-type (100) Si substrate with a lower resistivity ( $10^{-3}\sim 10^{-2}$   $\Omega\cdot\text{cm}$ ) was used as the bottom electrode. During the test in this experiment, one probe of the probe station was first connected to the TiN of circular electrode point with the radius of 55  $\mu\text{m}$ , and the other probe was connected to the rectangular electrode of TiN (5500 $\times$ 4000  $\mu\text{m}^2$ ) to form measuring circuit, as shown in Fig. S1(b). The capacitance of the MIS structure capacitor was equivalent to the series connection of two capacitors  $C_1$  and  $C_2$ . Their relationship was described by the following equation:

$$\frac{1}{C} = \frac{1}{C_1} + \frac{1}{C_2} \quad (\text{S1})$$

Where  $C$  was the total capacitance,  $C_1$  and  $C_2$  were the two capacitors of the series circuit respectively.

In addition, the formula for the plate capacitor was described as:

$$C = \frac{\varepsilon_0 \varepsilon_r S}{d} \quad (\text{S2})$$

Where  $C$  was the total capacitance,  $\varepsilon_0$  was the vacuum dielectric constant,  $\varepsilon_r$  was the dielectric constant of the film,  $S$  was the area of the capacitor plate,  $d$  was

the plate spacing of the capacitor.

According to the above two formulas S1 and S2, the formula of the plate capacitor can also be described as:

$$C = \frac{C_1 C_2}{C_1 + C_2} = \frac{\varepsilon_0 \varepsilon_r S_1 S_2}{d(S_1 + S_2)} \quad (S3)$$

Since  $S_1 \gg S_2$ , the result of the total capacitance measurement ( $C$ ) was similar to the electrical performance of an order of magnitude smaller capacitor ( $C_2$ ).

In addition, the calculation formula for the capacitance of the plate capacitor can also be expressed as:

$$C = \frac{Q}{U} = \frac{P \times S}{U} \quad (S4)$$

Where  $C$  was the total capacitance,  $P$  was the polarization,  $S$  was the area of the capacitor plate,  $U$  was the applied voltage during the test.

According to the above two formulas S2 and S4, the formula of the polarization can also be described as:

$$P = \varepsilon_0 \varepsilon_r E \quad (S5)$$

Where  $P$  was the polarization,  $\varepsilon_0$  was the vacuum dielectric constant,  $\varepsilon_r$  was the relative permittivity of the film,  $E$  was the electric field.

Therefore, the relative permittivity ( $\varepsilon_r$ ) of the film can be obtained by calculating the slope of the polarization-electric field (P-E) curve of the film sample.

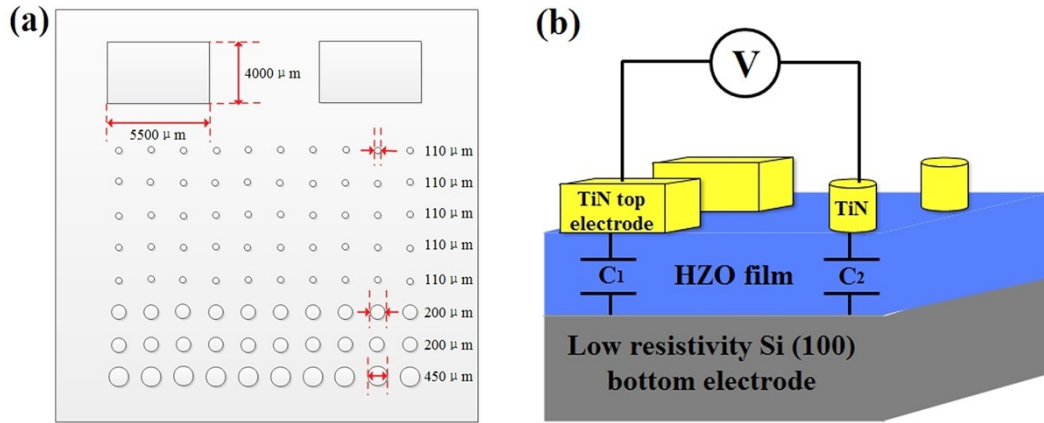

Fig. S1. (a) The hard mask design drawing of TiN top electrode. (b) Schematic diagram of MIS structure capacitor.
